# Supplementary material for: Correlation between transcript profiles and fitness of deletion mutants in anaerobic chemostat cultures of Saccharomyces cerevisiae
Source: PubMed Central journal article supplement (PMC2895221; doi:10.1099/mic.0.2006/002873-0), 2007-03
Supplement: supp_153_3_877__1.pdf [file supp_153_3_877__1.pdf]

### Supplementary Table S1. Primers used in this study

KanMX qrtPCR reverse primer (used with uptag primer), TCGATTGATACTAACGCCGCCATCCAGTG; KanMX qrtPCR forward primer (used with downtag primer), TATTCTGGGCTCCATGTTCGC.

| Gene    | Forward primer for gene knockout                                                                             | Reverse primer for gene knockout                                                                                    | Gene position knockout       | Knockout size (bp) | Uptag for qrtPCR             | Downtag for qrtPCR                           |
|---------|--------------------------------------------------------------------------------------------------------------|---------------------------------------------------------------------------------------------------------------------|------------------------------|--------------------|------------------------------|----------------------------------------------|
| YGR059W | AAAAGGGAGTCGGTTGTCAACAGACTGTCTGTCTG<br>AATTTCCCAACCCTAGTTCTTAATCTACGGCAGCTG<br>AAGCTTCGTACGC                 | AGCACTATCTGTGGAATGGCTGTTGGAACCTTT<br>TCCGATTAGGATTGCCACAAGCGAACAGCAT<br>AGGCCACTAGTGGATCTG                          | Chr 7 from 607576 to 609076  | 1500               | CCCTAGTTCCTTAATC<br>TACGG    | GGATTGCCACAAGCG<br>AACA                      |
| URA3    | TCCTAGTCTGTGTCTGCTGCAAGCTATTTAATATCAT<br>GCACGAAAAGCAAACAACCTTGTGGGGCACACCC<br>AATTTAGACACAGCTGAAGCTTCGTACGC | ATTTGCAAAGGGAAGGGATGCTAAGGTAGAG<br>GGTGAACGTTACAGAAAAGCAGGCTGGGAAA<br>GGCGCGTCAAGTACAAAGTTAGCATGCCACTA<br>GTGGATCTG | Chr 5 from 116206 to 116936  | 730                | GGGCACACCCAATT<br>TAGACA     | GCGCGTCAAGTACAA<br>AGTTA                     |
| DANI    | AGTATATTAGCTGTGCGCCGAGCATTAGTGGCAAG<br>TGCAAGTCACGGACTTCTATCACATCAGCTGAAGC<br>TTCGTACGC                      | ACCAGCAATAGCAGCGGCACCGAAAACACCGT<br>TATTGAACTTGTGAGCCTACTGGATCTCGTGTG<br>CATAGGCCACTAGTGGATCTG                      | Chr 10 from 708740 to 709603 | 863                | GTCACGGACTTCTA<br>TCACAT     | GAGCCTACTGGATCTC<br>GTGT                     |
| UPC2    | CAGAATCACAAAGAAAGCGGTGACAAAACCCAGAA<br>GAAGAGAAAAGTCATCGAGCTAATTGTACTCCGG<br>TTCAGCATGTTACAGTGAAGCTTCGTACGC  | TTTGTGTGTGTCATCGATGGTAATCCGCCACCG<br>AGGAAATCTAGCTAGGAGCTACCAGGACCTTC<br>GCATAGGCCACTAGTGGATCTG                     | Chr 4 from 889767 to 892468  | 2701               | GTACTIONCGGTTTCCAG<br>CATGTT | TAGGAGCTACCAGGA<br>CCTTC                     |
| ANB1    | ACATACACCTATTTTATTACACACTAAAACATGT<br>CTGACGGATATTGATCTCACCTGCCTCAGCTGAAG<br>CTTCGTACGC                      | GCTATAGAAATCTAAAATATCTAATCAGATCT<br>TGGAGCTTCCGAGATTAGACATCATGCTCGC<br>ATAGGCCACTAGTGGATCTG                         | Chr 10 from 525287 to 524844 | 443                | GATATTGATCTCAC<br>CTGCCT     | GCAGATTAGACATCAT<br>GCTC                     |
| MUC1    | GGTCCTTTTCGCTTCTATTTAACTCGGCTTTGGGTTT<br>TCCAGCCAGGTAGTACAGTTACGCAGCTGAAGCT<br>TCGTACGC                      | GGAAGAGCGAGTAGCAACCACATAAAAGTTTCC<br>AAGAACCCTGATAGTGCCCGTAAGTCTCCGGC<br>ATAGGCCACTAGTGGATCTG                       | Chr 9 from 393604 to 389582  | 4022               | GCCCAGGTAGTACA<br>GTTACG     | ATAGTGCCCGTAAGTC<br>TCCG                     |
| SML1    | CAAGACTACTTTTACGCTCAAATCGCTGCCAACA<br>ACAACAAGCCCGACTGCTCTTCAGGCTATTACAGCT<br>GAAGCTTCGTACGC                 | TCCTCGACCTTACCCTGGTTGAACATAGATTTT<br>AGTTCCGCCACGGCTTGCTCATAGTATTGCATAG<br>GCCACTAGTGGATCTG                         | Chr 13 from 159395 to 159684 | 289                | CGACTGCTCTTCAG<br>GCTATT     | CACGGCTTGCTCATAG<br>TATT (from<br>YML058C-A) |
| FET4    | AATCCAGGTGCTAGGCTGACGTTTCATCATAGAGC<br>ACCTACCGCATCATGGAACATAGACCAGCTGAAGC<br>TTCGTACGC                      | GGGAAACGCTTTTCTACGTATGATAGAAGTAT<br>GCGCCTACCGCCAGATAGTCAAGACGACGCAT<br>AGGCCACTAGTGGATCTG                          | Chr 13 from 914470 to 912942 | 1528               | CCGCATCATGGAAC<br>ATAGAC     | CGCCAGATAGTCAAG<br>ACGAC                     |
| YLR143W | CCCATTGTGCTTTATTGACACTTACAACATTTCT<br>GTTGACCATATACGGACCACAGGCTGCCAGCTGAA<br>GCTTCGTACGC                     | GGGGCTTTTCGTGTTCTCAATGATTCTTGAGGT<br>AGTAGAGAGTTGAGACCATTACATCGCATA<br>GGCCACTAGTGGATCTG                            | Chr 12 from 951173 to 953150 | 1977               | ATATACGGACCACA<br>GGCTGC     | AGTTGAGACCCATTCA<br>CATC                     |
| AAC3    | ATGAGTAGCGACGCTAAGCAACAAGAAAACAACCT<br>TTGCCAACAGCTATTAGGACGTGTTGCAGCTGAAG<br>CTTCGTACGC                     | CGAACAATATCATTTGCAACTGGTCATACATG<br>GAAATAACACATGGTCCGACTGGATCACCTGC<br>ATAGGCCACTAGTGGATCTG                        | Chr 2 from 415977 to 416883  | 906                | ACAGCTATTAGGAC<br>GTGTTG     | ATGGTCCGACTGGATC<br>ACCT                     |
| PLB2    | CATATTACAGGCTAGCTCGCTAATTTCTGGACTTTC<br>GCTCCACAGCATGAAATTGGTCCACAGCTGAAGCT<br>TCGTACGC                      | GCTGTTATGGCACCTAACAAAACCTATTAGAGT<br>ATTAGTGTCCGCTAGTCAAATATGTCCAGC<br>ATAGGCCACTAGTGGATCTG                         | Chr 13 from 279628 to 277621 | 2007               | CACAGCATGAAATT<br>GGTCCA     | CGCCTAGTCAAATATG<br>TCCA (from<br>YMR007W)   |

| Gene    | Forward primer for gene knockout                                                             | Reverse primer for gene knockout                                                             | Gene position knockout         | Knockout size (bp) | Uptag for qrtPCR         | Downtag for qrtPCR       |
|---------|----------------------------------------------------------------------------------------------|----------------------------------------------------------------------------------------------|--------------------------------|--------------------|--------------------------|--------------------------|
| YJR116W | GCAATGAACGCCAACTCTACCACGACAGCAATCGG<br>CCTCACCGACTCTACGATACGTCGCTGCAGCTGAA<br>GCTTCGTACGC    | TCTAGCTTCGACGTTGGGGCTGGTTTTGCAAGT<br>TTCTTGGGACGTATTGGCATAGTTGCTGCATAG<br>GCCACTAGTGGATCTG   | Chr 10 from 640738 to 641576   | 838                | GACTCTACGATACG<br>TCGCTG | GACGTATTGGCATAGT<br>TGCT |
| YGR131W | GTGCGCATATAAATGCTGTTTTTCTTATTATATCC<br>ATAGGAGAATTTGCACCAAGCGCGACAGCTGAAG<br>CTTCGTACGC      | GAAATTGTAGGTATGCCCATTTGTCTTCTTGCC<br>CTCCTTCCGCCCAAGTATGGTAAATAGCATA<br>GGCCACTAGTGGATCTG    | Chr 7 from 754755 to 755245    | 490                | AGAATTTGCACCAA<br>GCGCGA | CGCCGCAAGTATGGTA<br>AATA |
| YOR012W | AAGAATCCTCTTTGGCGGTAACCTTGACAAGCGAT<br>GTAGAGCAGATAATACTGTCACCCAGCTGAAGC<br>TTCGTACGC        | GCATAAAGGTAGTAATAGTCCATTCCCAGAGG<br>CATGACTTCGCCAAACAAGAGCTTCTGAGCA<br>TAGGCCACTAGTGGATCTG   | Chr 15 from 356565 to 356898   | 333                | GCAGATAATACACT<br>GTCACC | GCCCAAACAAGAGCTT<br>CTGA |
| YHL042W | GTAGCAACTGTTATATTCTTCGTACATGAGTATCCGT<br>TCTCCACATACGATCACAGTTAGGTCCAGCTGAAG<br>CTTCGTACGC   | CACAGGCAATGTCGGCTTTTCTGATATACGGC<br>AACAATTCCTCGCGGGAACAAGATGCAAGCAT<br>AGGCCACTAGTGGATCTG   | Chr 8 from 15686 to 16097      | 229                | CATACGATCACAGT<br>TAGGTC | CTCGCGGGAACAAGA<br>TGCAA |
| YOL101C | TTCATTGACTACAATAGAGCAAAGCCAGTCAAAT<br>GCGAGACTATTTCTACGCCGACAGGGCAGCTGAA<br>GCTTCGTACGC      | CGGGCTGATTCAAACCTGAATGCATCAAATA<br>TAAGATTGTGTGTCACCGCACTTCATGGGCAT<br>AGGCCACTAGTGGATCTG    | Chr 15 from 127874 to 127044   | 830                | TATTTCTCACGCCG<br>ACAGGG | TGTGTCACCGCACTTC<br>ATGG |
| COX5B   | GCCACATATTCATTGTAAAGAGCATGTATAACAAA<br>CACTGATACATCTGCGAAATGCGGCCACAGCTGAA<br>GCTTCGTACGC    | C TTCAGATACTCGTCTGATTTCAACTGCCATTC<br>CCTGTTCTCATGCTGTACCATATTGGGGCATAG<br>GCCACTAGTGGATCTG  | Chr 9 from 155199 to 155711    | 512                | ACATCTGCGAAATG<br>CGGCCA | TCATGCTGTACCATAT<br>TGGG |
| YOR013W | GGTGAAATGCTGAGGCAAATGATTTTCGATGCAGT<br>CGCAATATGGAGGATAGCTCTCAATTCACCCAGCT<br>GAAGCTTCGTACGC | ATCTTTGTGGTAGAGCATCAAGTAGGCCGTGA<br>ATCCCTTCATGAGTGACAAGGTTCTGAGCAT<br>AGGCCACTAGTGGATCTG    | Chr 15 from 356762 to 357197   | 435                | AGGATAGCTCTCAA<br>TTCACC | CATGAGTGACAAGGTT<br>CTGA |
| ECM34   | CCGCAAAAGTGAAGATGAAAAGAACGAAGCCGCT<br>TTAGCCTACACTCAGCATATAGGTCCAGCTGAA<br>GCTTCGTACGC       | GGGTTCTCCTAAATGCTACATGGCAGCTAGAA<br>CCATCAACAACATGAGTCCAAAGGTGGCAAGC<br>ATAGGCCACTAGTGGATCTG | Chr 8 from 14907 to 15446      | 539                | CACTCACGACATA<br>TAGGTC  | CATGAGTCCAAAGGTG<br>GCAA |
| IZH2    | TATTAGAAAGGACTAAGAGTGTGCAAGAGCTGAA<br>GAAGAGGAGACAGGAGCATATTGTACCAGCTGAA<br>GCTTCGTACGC      | GACAATCCCCTTCTCCATCTTTATATGGACTAA<br>CTCATAACAGCTGATAATTCAAGGCACCGCAT<br>AGGCCACTAGTGGATCTG  | Chr 15 from 324316 to 323458   | 858                | GAGACAGGAGCATA<br>TTGTAC | AGCTGATAAATCAAGG<br>CACC |
| YLR437C | GGCAAGCAGCCTCGTCCCAAAGAGACAGCTTCAAC<br>AACAATGATACTGCCATACTGGCGCAGCTGAAGC<br>TTCGTACGC       | GTCTTCTTGGATCCATTAAACCATTGTTTCGT<br>GCTCCGCAGGCACCTACGATATGCTCGGCATA<br>GGCCACTAGTGGATCTG    | Chr 12 from 1011961 to 1011663 | 298                | TGATACTGCCCATA<br>CTGGCG | AGGCACCTACGATATG<br>CTCG |
| SRO77   | TTGAAGAATGTGTCAAATGCTATCAAATCCGCGAG<br>AGTTTCAGACCTCAGCTTCAAGTAAACGCAGCTGAAGC<br>TTCGTACGC   | CTCTTCATCATATCCCTTCCCGTTTTCTTCCATTG<br>CGTCATACCTTATGTGTAATGAGCGGCATAG<br>GCCACTAGTGGATCTG   | Chr 2 from 13819 to 10902      | 2917               | AGACCTCAGCTTCA<br>GTAACG | ACCTTATGTGTAATGA<br>GCGG |
| SET4    | CACTATCTTCTCGTCATATCAGGCAAGGAAGGACA<br>TACACTAGTCCCTTACATATCTGCGCAGCTGAAGC<br>TTCGTACGC      | CGTTTATGGCTTACAGTTGTGCATTATTGTATT<br>AAAGTAAGAGATCTAGCCACAGTGTATGCGCA<br>TAGGCCACTAGTGGATCTG | Chr 10 from 224989 to 226658   | 1669               | TAGTCCTTACATA<br>TCTGCG  | GATCTAGCCACAGTGT<br>ATGC |
| YDL241W | GAAAATGCTCTATTGTTTAAAGTGCAGTGAAGGG<br>CTATATGGGCACACTAGGAAATCCACAGCTGAAG<br>CTTCGTACGC       | CACTAGCATGAACAGTATGGTAAATTTGGCGA<br>GAGAATGAGGAGACCCACTTAATGGCAACGCA<br>TAGGCCACTAGTGGATCTG  | Chr 4 from 20647 to 20988      | 341                | GGGCACACTAGGAA<br>ACTCCA | GAGACCCACTTAATGG<br>CAAC |

| Gene        | Forward primer for gene knockout                                                         | Reverse primer for gene knockout                                                             | Gene position knockout           | Knockout size (bp) | Uptag for qrtPCR         | Downtag for qrtPCR       |
|-------------|------------------------------------------------------------------------------------------|----------------------------------------------------------------------------------------------|----------------------------------|--------------------|--------------------------|--------------------------|
| YPL272C     | CTCACTTTATCATAATGACTACGTTTAGGCCACTAT<br>CAAGTAGACTCAGCCAGATGCCAGCAGCTGAAGCT<br>TCGTACGC  | CGTCACCTGCCTATTCAATAAAAGGATTTCGAAG<br>CATTCTACCAGATGTCAGAATAGCTCACGCAT<br>AGGCCACTAGTGGATCTG | Chr 16 from 28139 to<br>26640    | 1499               | TAGACTCAGCCAGA<br>TGCCAG | CAGATGTCAGAATAGC<br>TCAC |
| <i>GSY1</i> | ATCATCTACTGTTTGAAGTAGCAACAGAAGTAACT<br>AACAGGCCCATCCAGTTGAATGAGAGCAGCTGAA<br>GCTTCGTACGC | CCTCGTAGTATGCAGACGTATCGTTGTCATCAT<br>CGTCATTTCGTTACATACTCAGCCATAGGCATA<br>GGCCACTAGTGGATCTG  | Chr 6 from 176324 to<br>174304   | 2020               | CCCATCCAGTTGAA<br>TGAGAG | CGTTACATACTCAGCC<br>ATAG |
| YGL039W     | ACTACTGAAAAAACC GTTGT TTTTCTGGTGCT<br>ACTGGCTAGAAACAGAAGGGTCGTCAGCTGAAG<br>CTTCGTACGC    | CITCTAGTAATTGCGAGGCAGTATCGACAATG<br>CAATCTCACCATTGTACGATTGGTGCATA<br>GGCCACTAGTGGATCTG       | Chr 7 from 423970 to<br>424996   | 1026               | CTAGAAACAGAAGG<br>GTCGTC | CACCGATTGTACGATT<br>TGGT |
| <i>YSR3</i> | TGAATTGGGTGTTACCGAGGACACCATTAAGGTTT<br>AGATGCACTCTATGCAATTAAGGCCAGCTGAAGC<br>TTCGTACGC   | AAGTAAAAAAACTGGGCATAGCAAAAAGAC<br>GGTTGTAGGTATGACAGCACAGGTGGTCCGCA<br>TAGGCCACTAGTGGATCTG    | Chr 11 from 534861<br>to 533765  | 1096               | CACTCTATGCAATT<br>AAGGCC | TATGACAGCACAGGTG<br>GTCC |
| <i>EUG1</i> | TTCAATTTCCAAGACTTGACGTTTCAATTATATGGC<br>AATCAGCAGTGGCCGATTCCCTTTCAGCTGAAGCT<br>TCGTACGC  | TATTTTCTTCCAGAAACGATGCGAGTAATCAG<br>ATGTAAACCACGCGAAGAACGGATTTAGCAT<br>AGGCCACTAGTGGATCTG    | Chr 4 from 1478531<br>to 1480223 | 1692               | AGCAGTGGCCGATT<br>CCCTTT | CCACGCGAAGAACGG<br>ATTTA |
