# Supplementary material for: Correlation between transcript profiles and fitness of deletion mutants in anaerobic chemostat cultures of Saccharomyces cerevisiae
Source: PubMed Central journal article supplement (PMC2895221; doi:10.1099/mic.0.2006/002873-0), 2007-03
Supplement: supp_153_3_877__2.pdf [file supp_153_3_877__2.pdf]

**Supplementary Table S2.** Expression data of YGR059W and ACT1 over 20 different chemostat culture conditions at a dilution rate of 0.1 h<sup>-1</sup>

| C source  | N source                                        | Aeration                                     | Limitation | YGR059W  | ACT1         | Reference                           | GEO access no. |
|-----------|-------------------------------------------------|----------------------------------------------|------------|----------|--------------|-------------------------------------|----------------|
| Glucose   | (NH <sub>4</sub> ) <sub>2</sub> SO <sub>4</sub> | + Air                                        | Carbon     | 12.0±0.0 | 2628.0±204.9 | Tai <i>et al.</i> (2005)            | GSE1723        |
| Glucose   | (NH <sub>4</sub> ) <sub>2</sub> SO <sub>4</sub> | + Air                                        | Nitrogen   | 12.0±0.0 | 2265.3±106.0 | Tai <i>et al.</i> (2005)            | GSE1723        |
| Glucose   | (NH <sub>4</sub> ) <sub>2</sub> SO <sub>4</sub> | + Air                                        | Phosphorus | 12.0±0.0 | 2314.4±265.5 | Tai <i>et al.</i> (2005)            | GSE1723        |
| Glucose   | (NH <sub>4</sub> ) <sub>2</sub> SO <sub>4</sub> | + Air                                        | Sulfur     | 12.0±0.0 | 2172.1±249.4 | Tai <i>et al.</i> (2005)            | GSE1723        |
| Glucose   | (NH <sub>4</sub> ) <sub>2</sub> SO <sub>4</sub> | + 100 % N <sub>2</sub>                       | Carbon     | 14.8±3.0 | 3726.5±135.9 | Tai <i>et al.</i> (2005)            | GSE1723        |
| Glucose   | (NH <sub>4</sub> ) <sub>2</sub> SO <sub>4</sub> | + 100 % N <sub>2</sub>                       | Nitrogen   | 12.0±0.0 | 2286.7±362.9 | Tai <i>et al.</i> (2005)            | GSE1723        |
| Glucose   | (NH <sub>4</sub> ) <sub>2</sub> SO <sub>4</sub> | + 100 % N <sub>2</sub>                       | Phosphorus | 16.2±4.0 | 2516.5±101.4 | Tai <i>et al.</i> (2005)            | GSE1723        |
| Glucose   | (NH <sub>4</sub> ) <sub>2</sub> SO <sub>4</sub> | + 100 % N <sub>2</sub>                       | Sulfur     | 12.0±0.0 | 2345.9±248.9 | Tai <i>et al.</i> (2005)            | GSE1723        |
| Ethanol   | (NH <sub>4</sub> ) <sub>2</sub> SO <sub>4</sub> | + Air                                        | Carbon     | 12.0±0.0 | 3226.6±494.9 | Daran-Lapujade <i>et al.</i> (2004) | NA             |
| Acetate   | (NH <sub>4</sub> ) <sub>2</sub> SO <sub>4</sub> | + Air                                        | Carbon     | 12.0±0.0 | 3233.9±375.6 | Daran-Lapujade <i>et al.</i> (2004) | NA             |
| Maltose   | (NH <sub>4</sub> ) <sub>2</sub> SO <sub>4</sub> | + Air                                        | Carbon     | 12.0±0.0 | 4674.3±581.8 | Daran-Lapujade <i>et al.</i> (2004) | NA             |
| Galactose | (NH <sub>4</sub> ) <sub>2</sub> SO <sub>4</sub> | + Air                                        | Carbon     | 12.0±0.0 | 2676.4±120.3 | Not published                       | NA             |
| Glucose   | (NH <sub>4</sub> ) <sub>2</sub> SO <sub>4</sub> | + 100 % CO <sub>2</sub>                      | Carbon     | 12.3±0.6 | 2974.6±322.6 | Aguilera <i>et al.</i> (2005)       | NA             |
| Glucose   | (NH <sub>4</sub> ) <sub>2</sub> SO <sub>4</sub> | + 79 % CO <sub>2</sub> + 21 % O <sub>2</sub> | Carbon     | 12.0±0.0 | 2332.6±219.6 | Aguilera <i>et al.</i> (2005)       | NA             |
| Glucose   | (NH <sub>4</sub> ) <sub>2</sub> SO <sub>4</sub> | + 79 % CO <sub>2</sub> + 21 % O <sub>2</sub> | Nitrogen   | 12.0±0.0 | 2273.2±225.1 | Aguilera <i>et al.</i> (2005)       | NA             |
| Glucose   | Asn                                             | + Air                                        | Carbon     | 13.5±2.6 | 2418.1±122.1 | Not published                       | NA             |
| Glucose   | Pro                                             | + Air                                        | Carbon     | 12.0±0.0 | 2294.8±127.6 | Not published                       | NA             |
| Glucose   | Phe                                             | + Air                                        | Carbon     | 12.0±0.0 | 2917.2±575.3 | Vuralhan <i>et al.</i> (2003)       | NA             |
| Glucose   | Leu                                             | + Air                                        | Carbon     | 12.0±0.0 | 2148.8±204.2 | Not published                       | NA             |
| Glucose   | Met                                             | + Air                                        | Carbon     | 12.0±0.0 | 2392.7±143.3 | Not published                       | NA             |

## REFERENCES

**Aguilera, J., Petit, T., de Winde, J. H. & Pronk, J. T. (2005).** Physiological and genome-wide transcriptional responses of *Saccharomyces cerevisiae* to high carbon dioxide concentrations. *FEMS Yeast Res* **5**, 579–593.

**Daran-Lapujade, P., Jansen, M. L., Daran, J. M., Van Gulik, W., de Winde, J. H. & Pronk, J. T. (2004).** Role of transcriptional regulation in controlling fluxes in central carbon metabolism of *Saccharomyces cerevisiae*. A chemostat culture study. *J Biol Chem* **279**, 9125–9138.

**Tai, S. L., Boer, V. M., Daran-Lapujade, P., Walsh, M. C., de Winde, J. H., Daran, J. M. & Pronk, J. T. (2005).** Two-dimensional transcriptome analysis in chemostat cultures: combinatorial effects of oxygen availability and macronutrient limitation in *Saccharomyces cerevisiae*. *J Biol Chem* **280**, 437–447.

**Vuralhan, Z., Morais, M. A., Tai, S. L., Piper, M. D. & Pronk, J. T. (2003).** Identification and characterization of phenylpyruvate decarboxylase genes in *Saccharomyces cerevisiae*. *Appl Environ Microbiol* **69**, 4534–4541.
